# Supplementary material
Source: MDPI journal article supplement (https://www.mdpi.com/2571-8797/2/2/11)

Title: Using Self-Organizing Maps to Elucidate Patterns among Variables in Simulated Syngas Combustion

D.L.B. Fortela, et al. (2020)

## Data Frequency Distribution

A) Heat Duty (cal/sec)

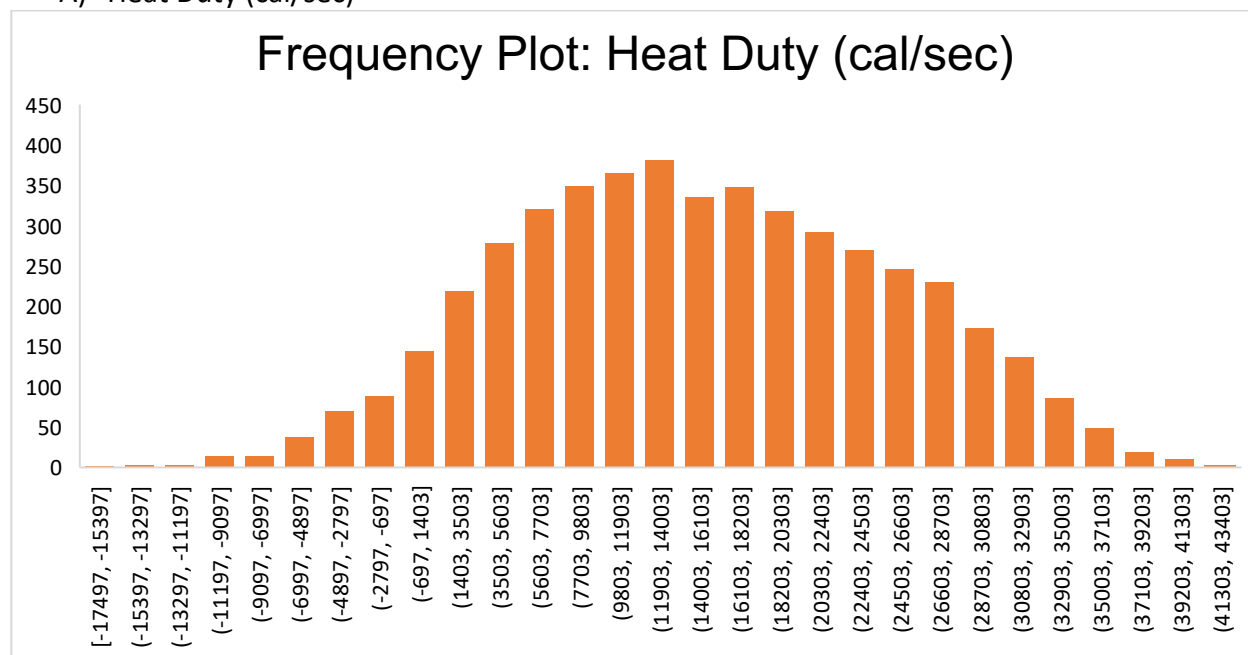

B) IN H<sub>2</sub>, mole fraction

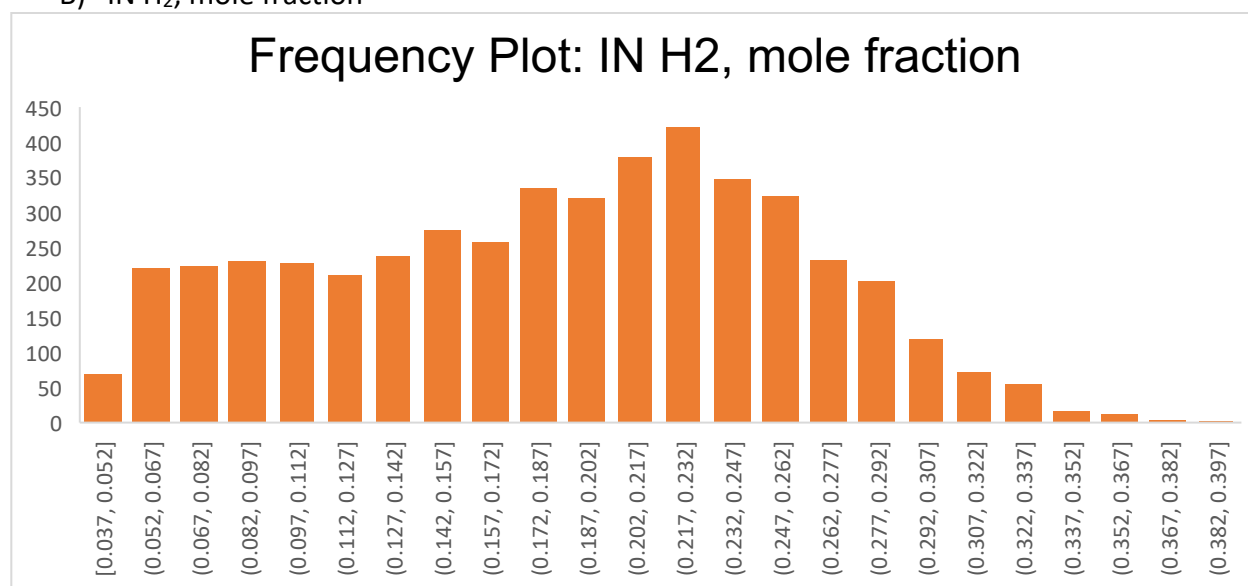

C) IN CO, mole fraction

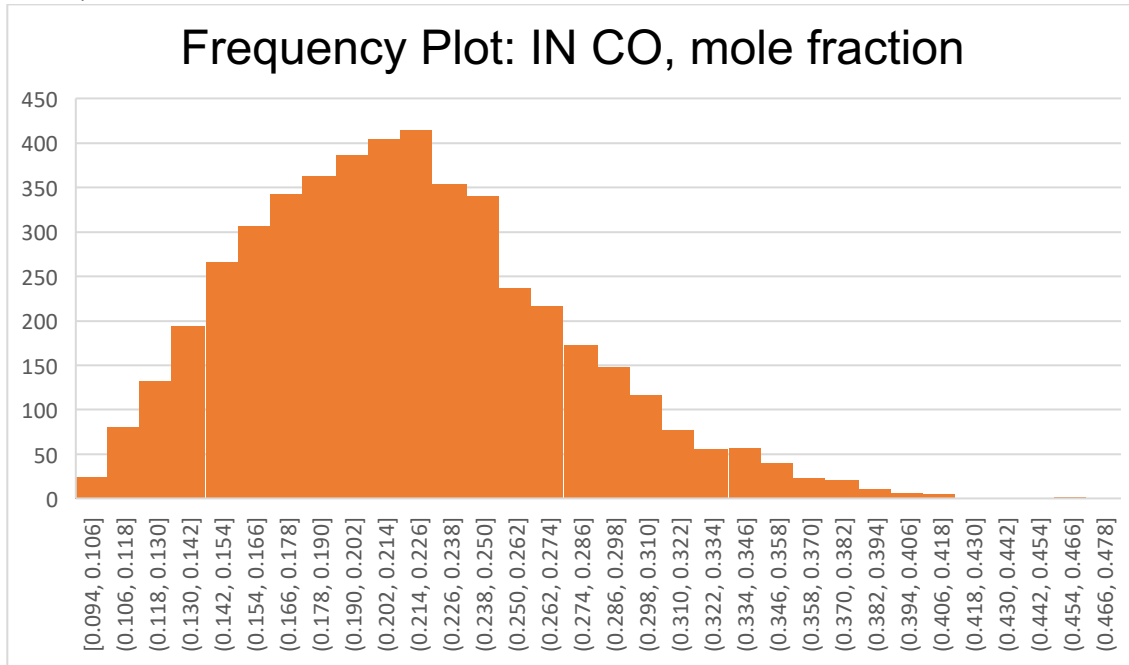

D) IN CH<sub>4</sub>, mole fraction

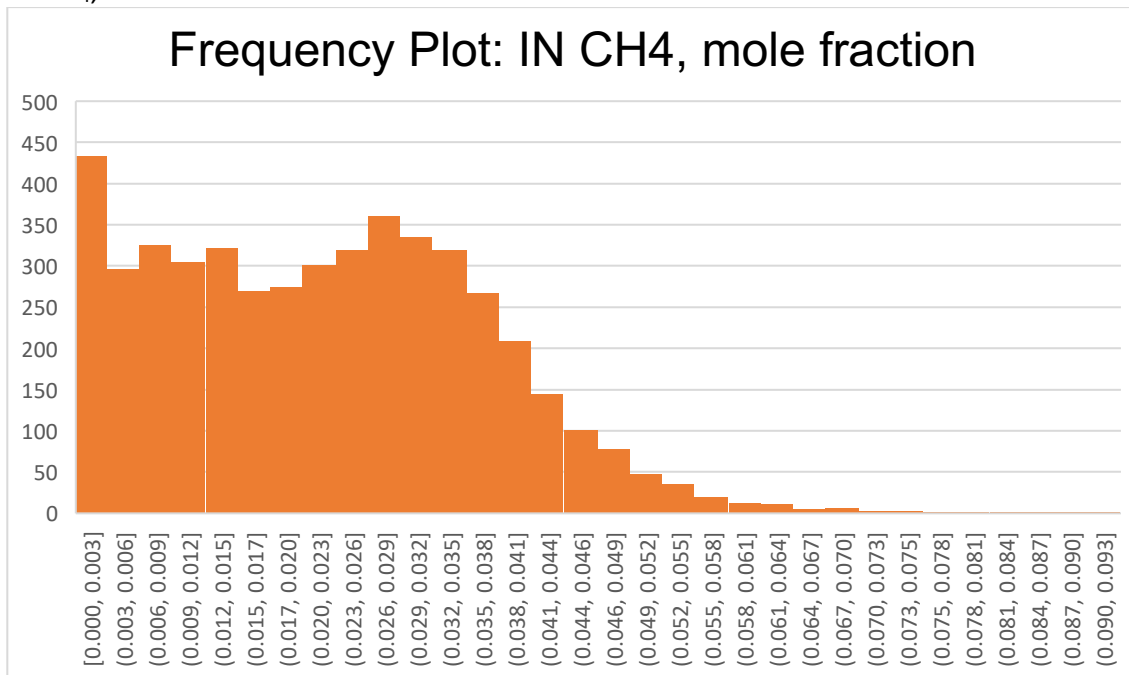

E) IN CO<sub>2</sub>, mole fraction

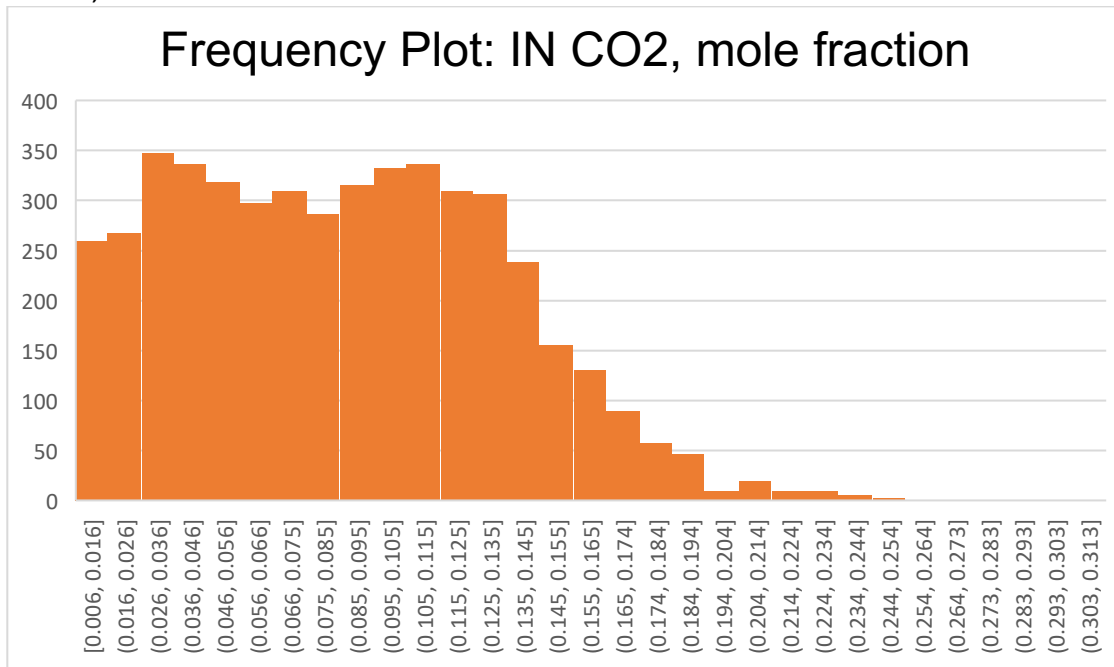

F) IN N<sub>2</sub>, mole fraction

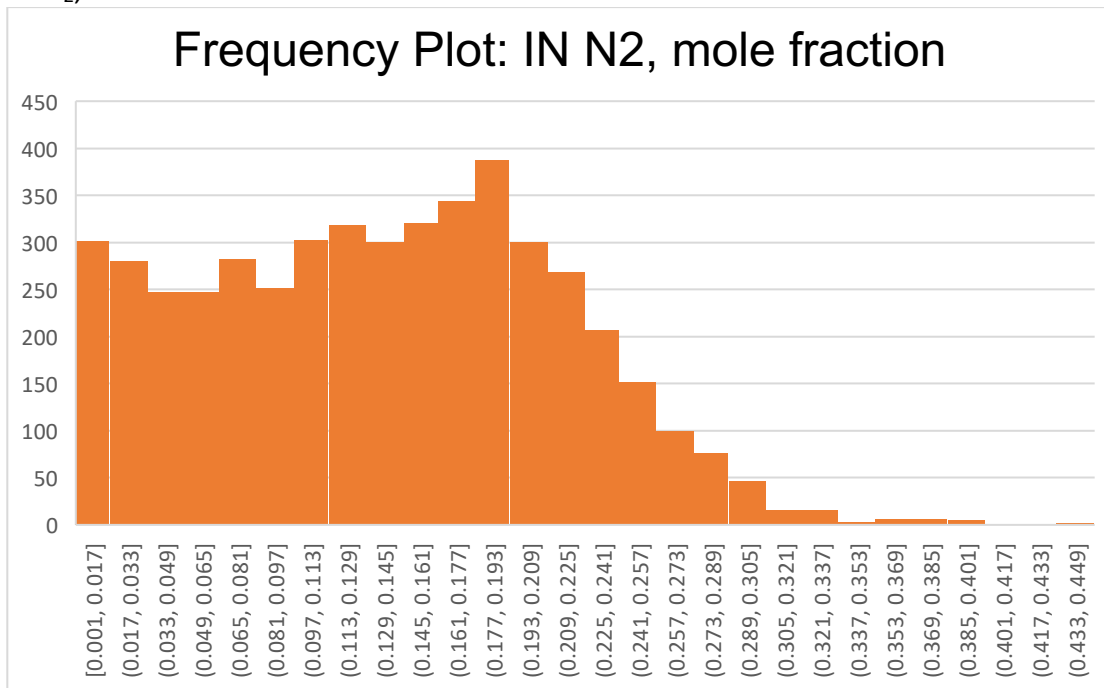

G) IN O<sub>2</sub>, mole fraction

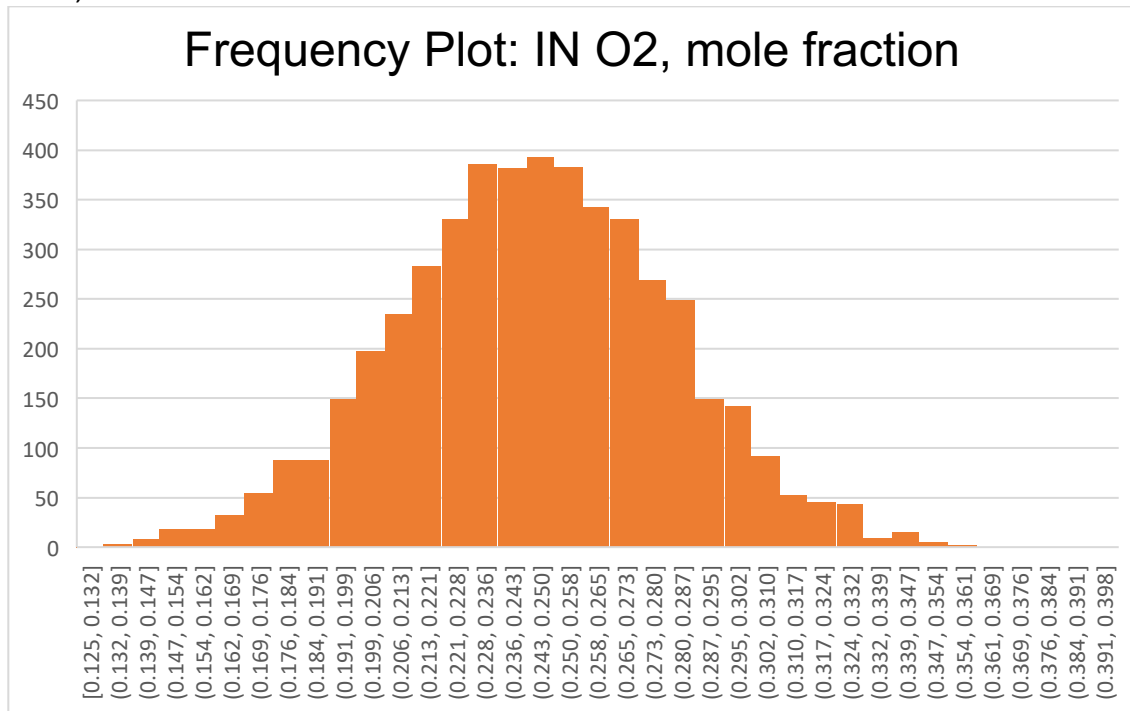

H) IN H<sub>2</sub>O, mole fraction

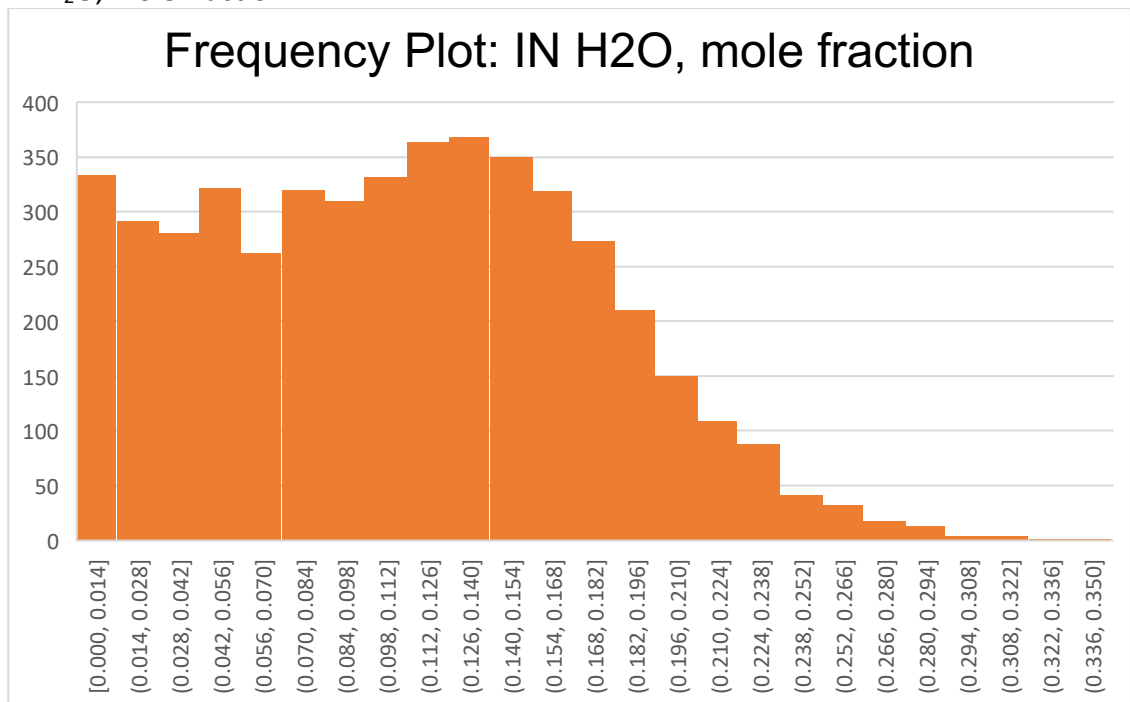

I)  $T_{\text{reactor}}, \text{K}$

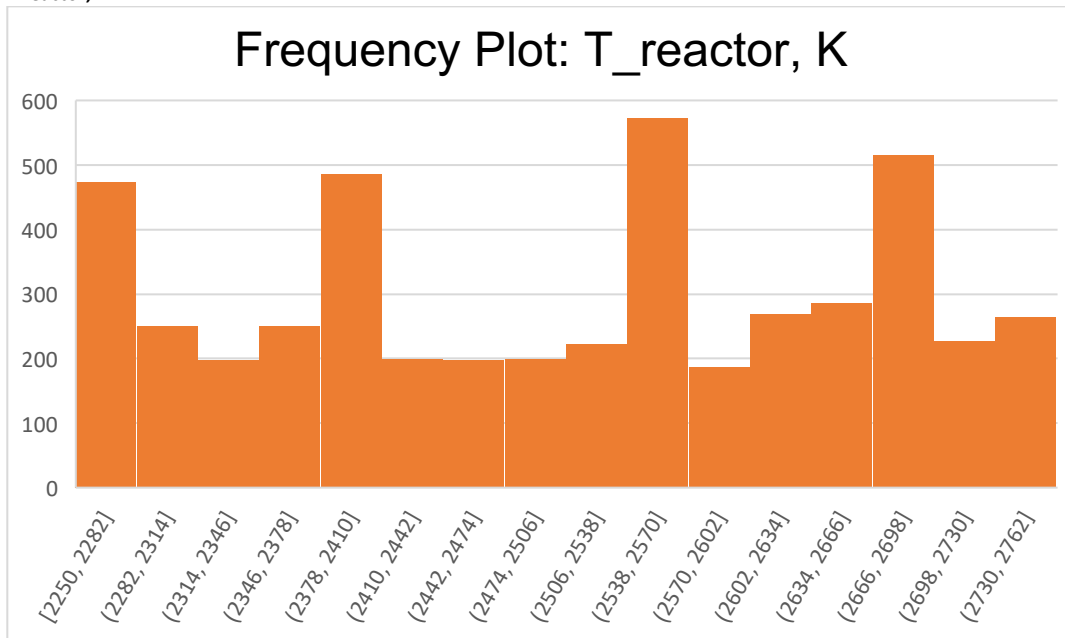

J) OUT mole Flow, kmol/h

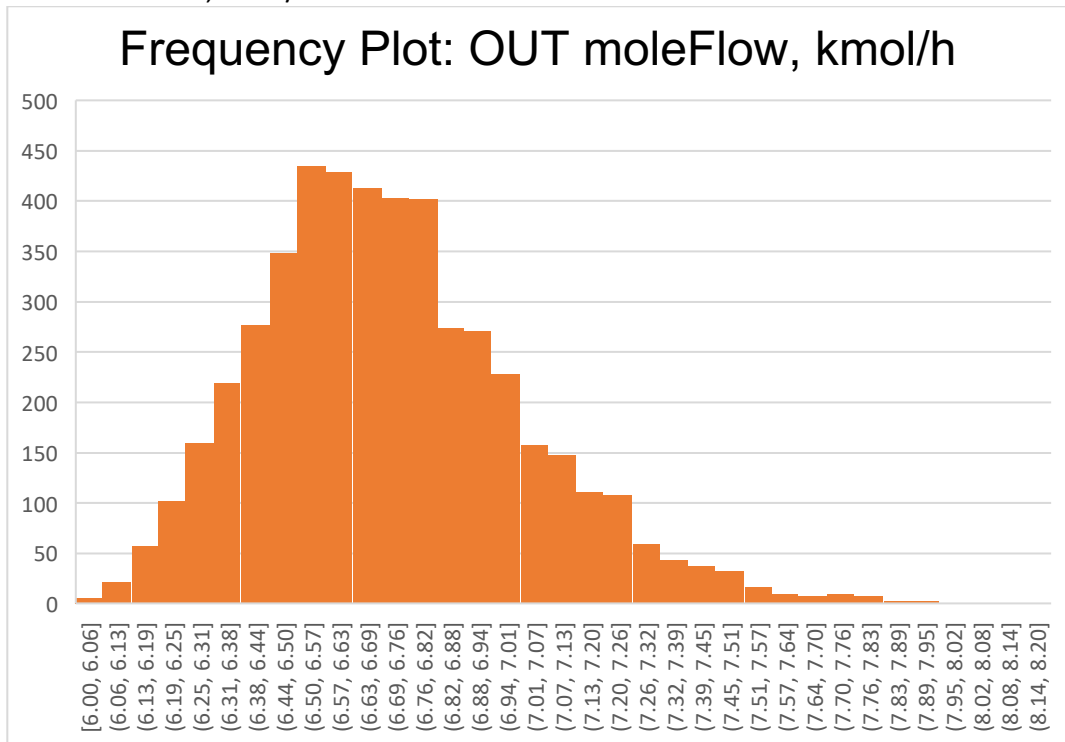

K) OUT CO, mole fraction

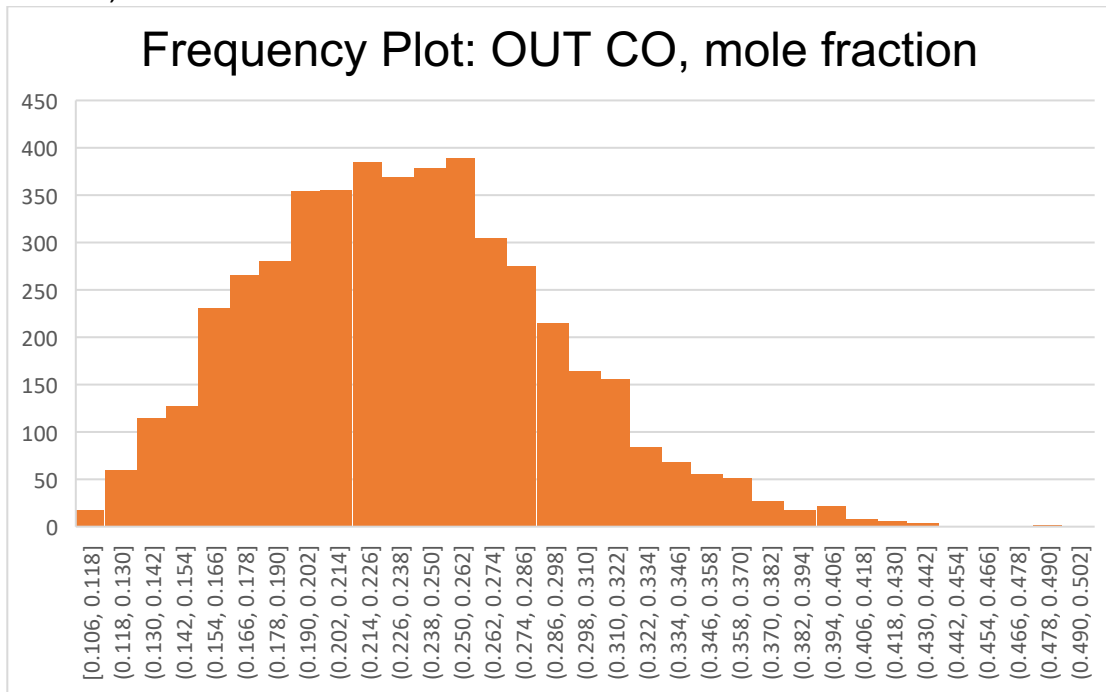

L) OUT CH<sub>4</sub>, mole fraction

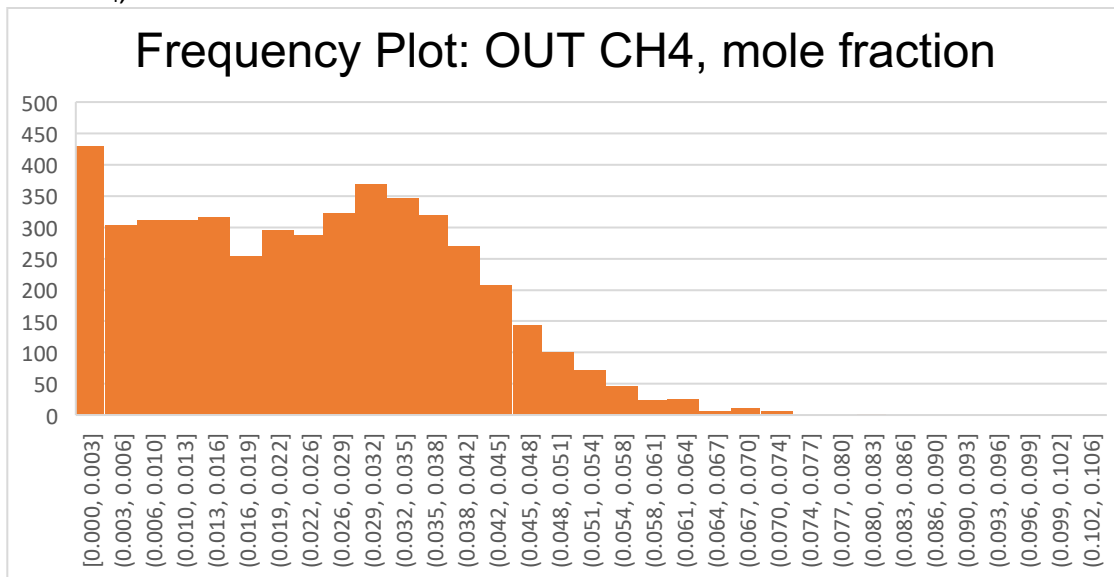

M) OUT CO<sub>2</sub>, mole fraction

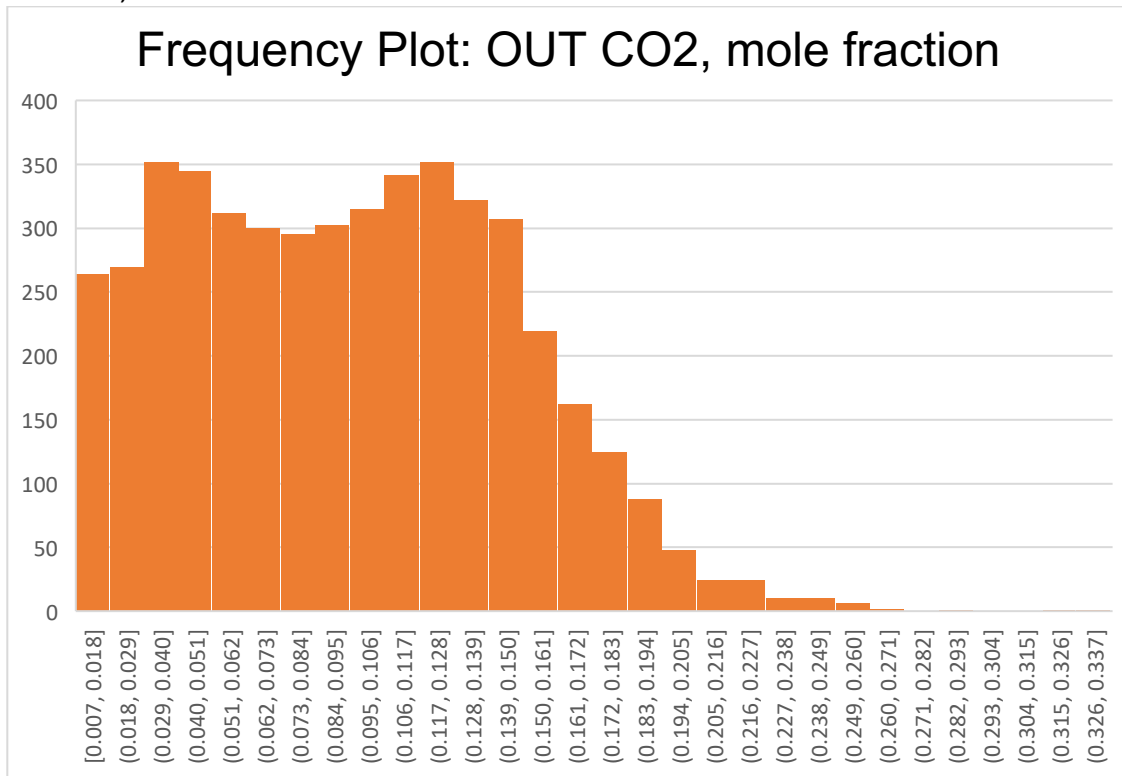

N) OUT N<sub>2</sub>, mole fraction

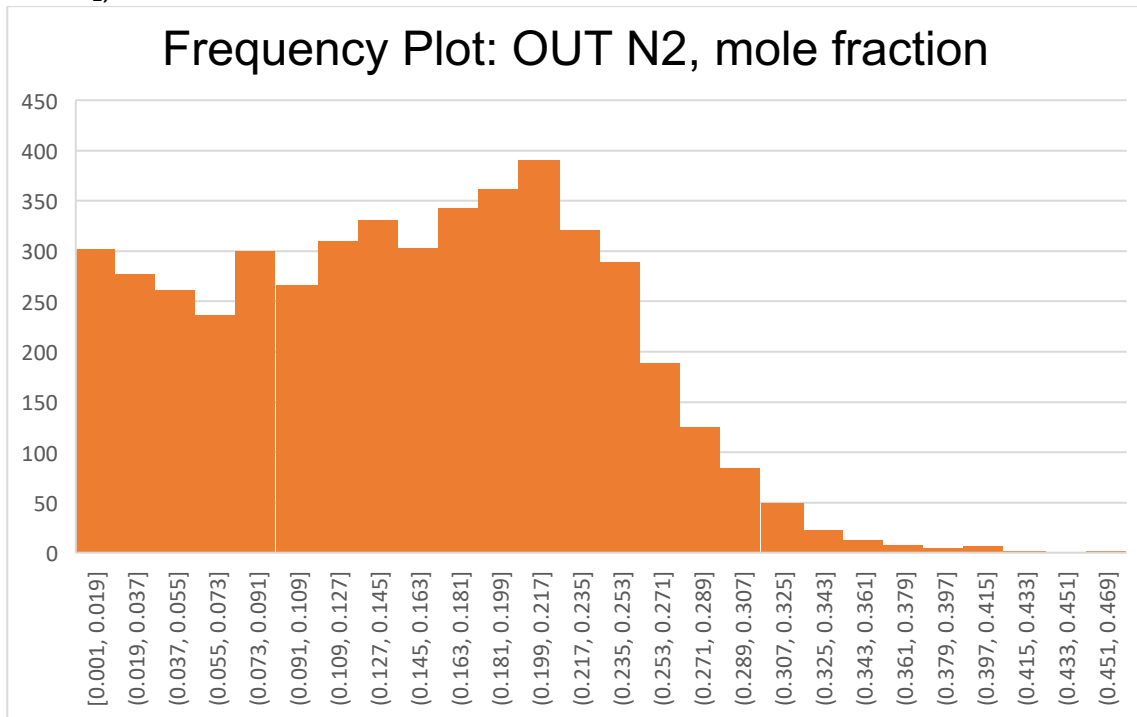

O) OUT O<sub>2</sub>, mole fraction

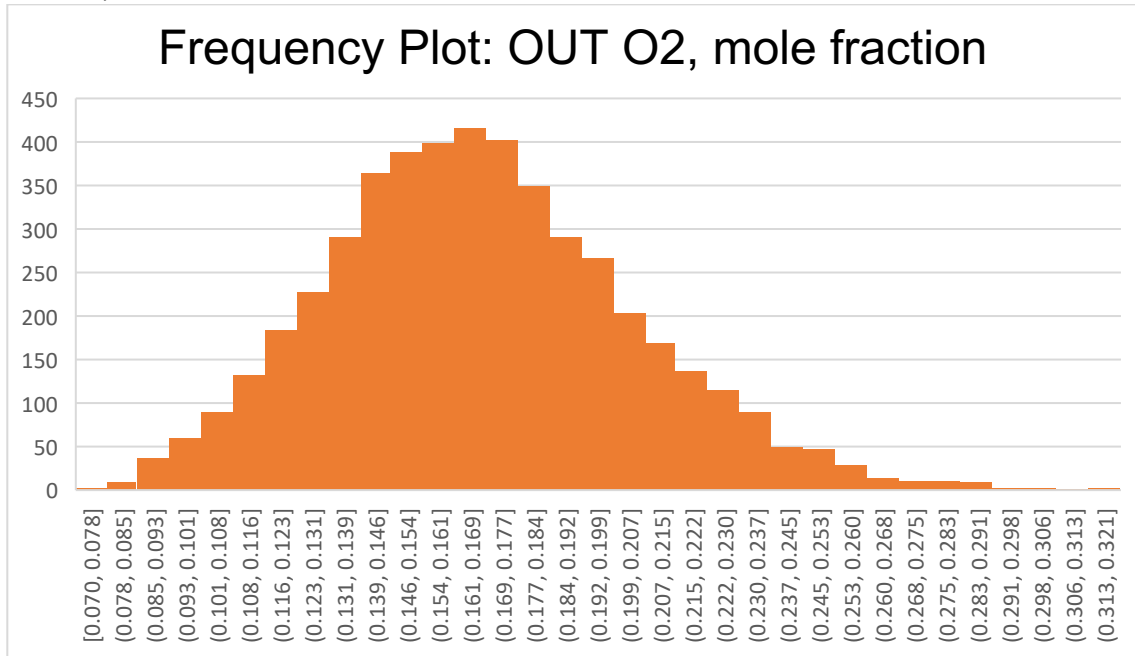

P) OUT H<sub>2</sub>O, mole fraction

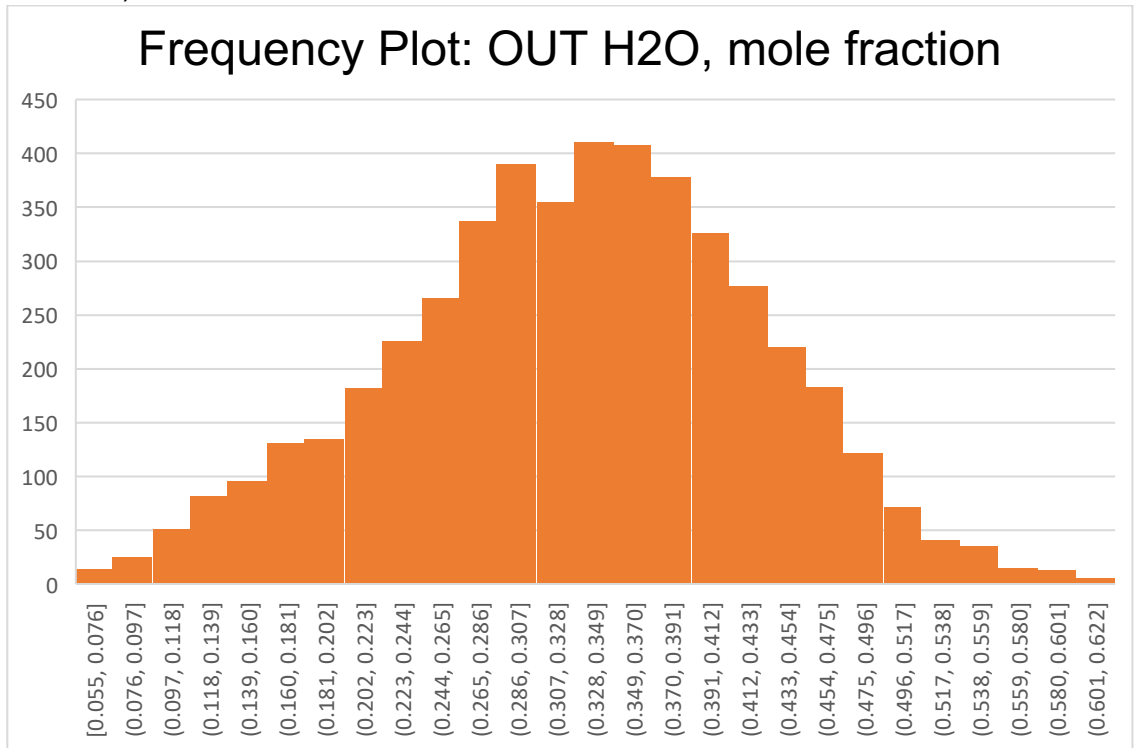

Supplement: s1 [file s1]
