# Supplementary material
Source: MDPI journal article supplement (https://www.mdpi.com/2571-8797/2/2/11)

## Comparison of U-matrix between rectangular 9x28 SOM and 47x28 SOM

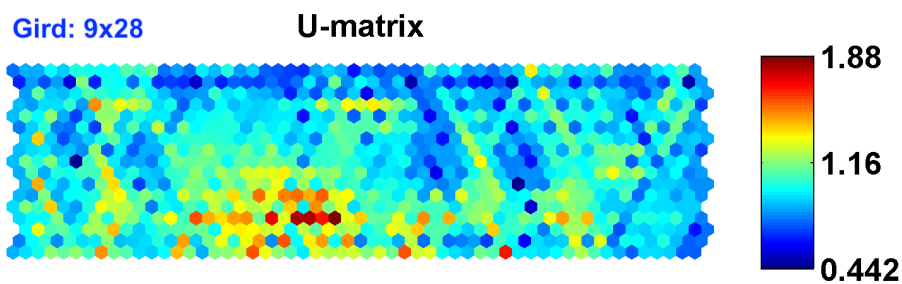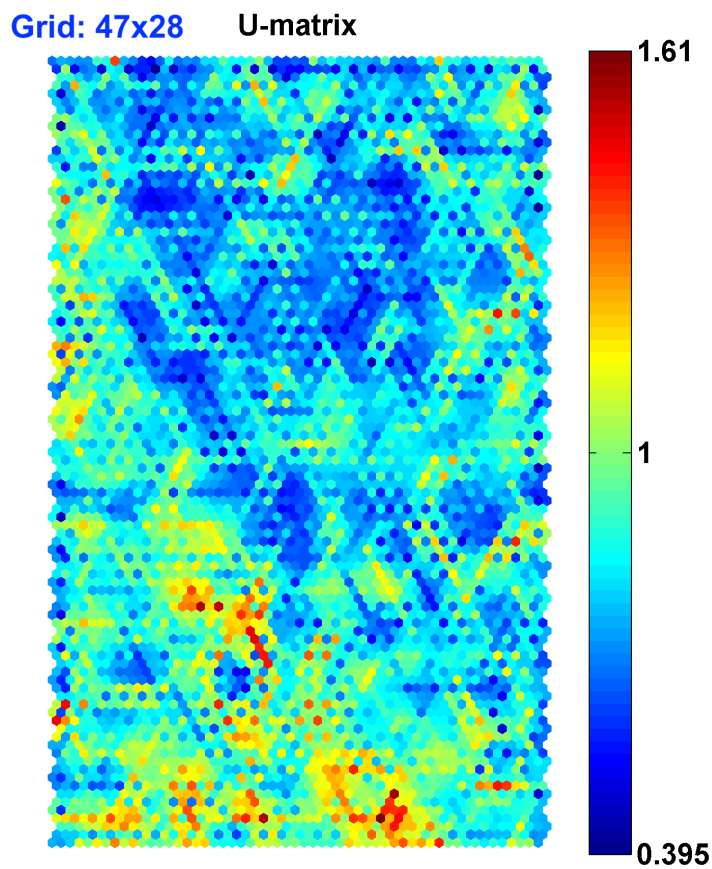

Supplement: s1 [file s1]
